# Supplementary material
Source: MDPI journal article supplement (https://www.mdpi.com/2073-4344/10/10/1150)
Supplement: s1 [file s1]

# Catalytic Removal of Alizarin Red using Chromium Manganese Oxide Nanorods: Degradation and Kinetic Studies

Muhammad Hamza <sup>1,2</sup>, Ataf Ali Altaf <sup>1,2,\*</sup>, Samia Kausar <sup>1,2</sup>, Shahzad Murtaza <sup>1</sup>, Nasir Rasool <sup>3</sup>, Rukhsana Gul <sup>4</sup>, Amin Badshah <sup>5</sup>, Muhammad Zaheer <sup>6</sup>, Syed Adnan Ali Shah <sup>7,8</sup> and Zainul Amiruddin Zakaria <sup>9,10,\*</sup>

Supplementary Data

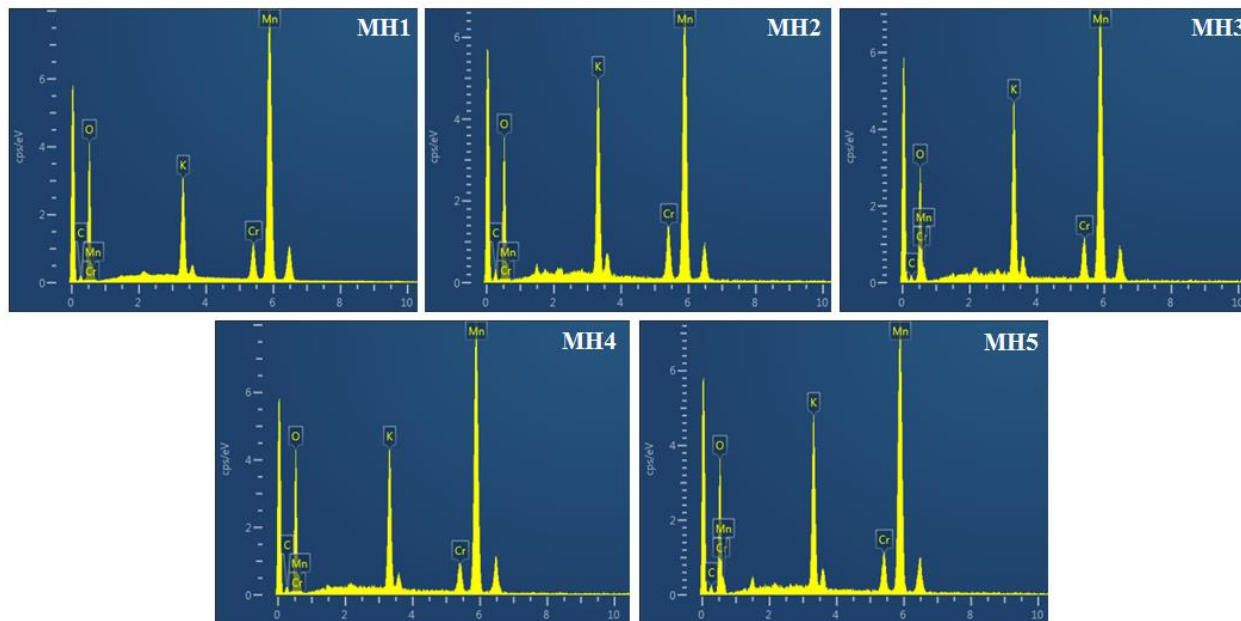

**Figure S1:** Energy dispersive X-ray (EDX) Spectra of Chromium Doped Manganese Oxide Nanomaterials (MH1-MH5)

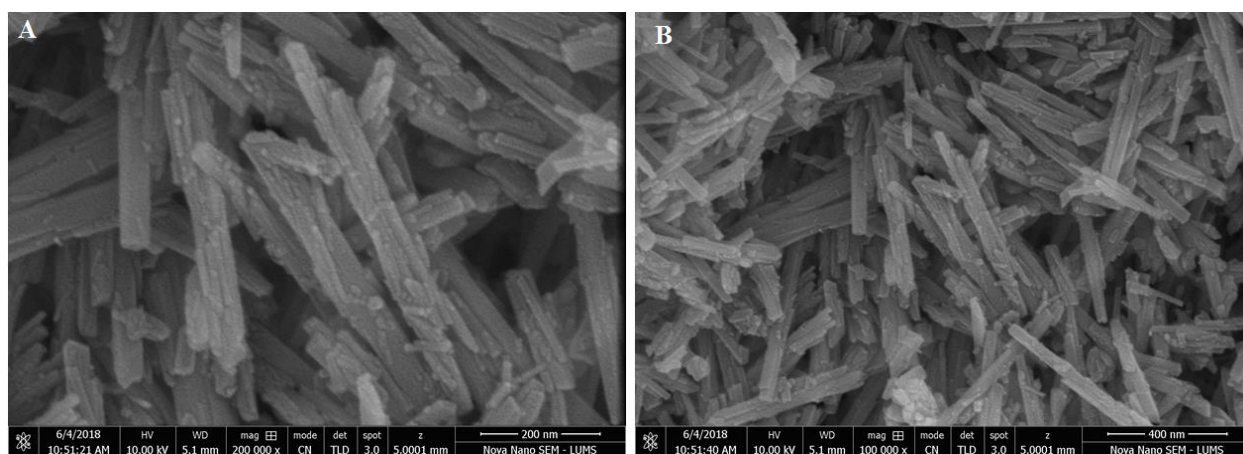

**Figure S2(a):** SEM Images of MH1; [A(200nm) and B(400nm)]

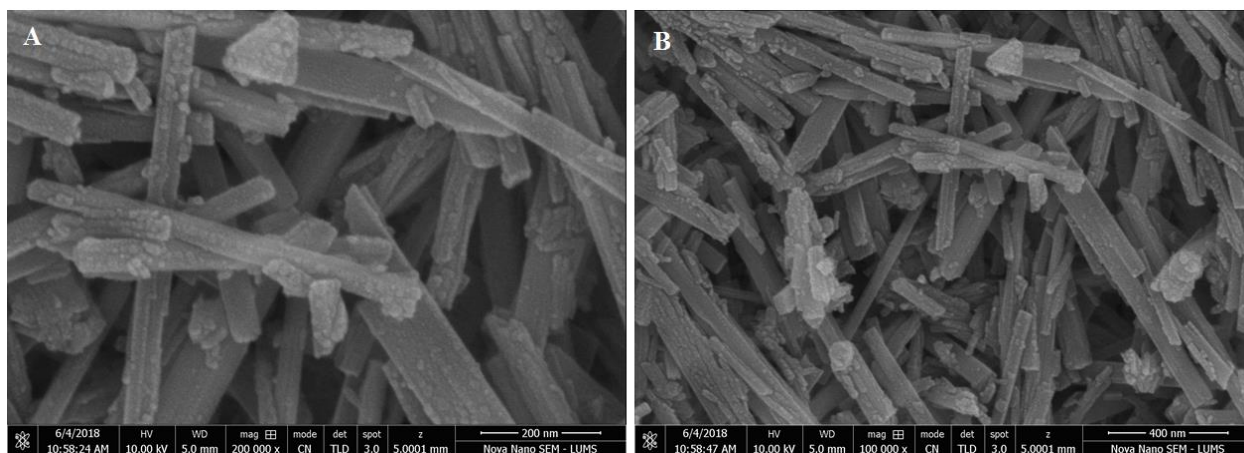

**Figure S2(b): SEM Images of MH2; [A(200nm) and B(400nm)]**

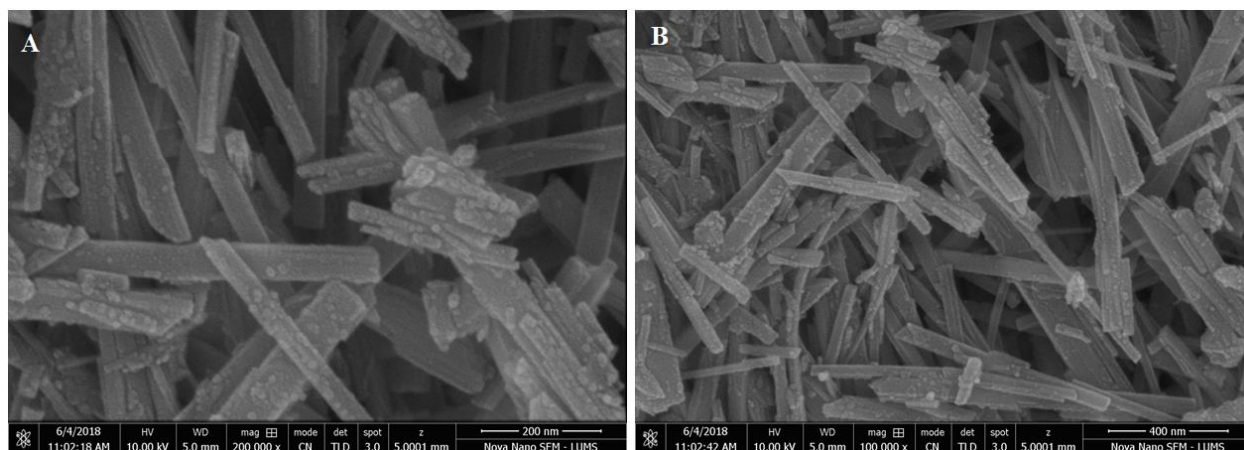

**Figure S2(c): SEM Images of MH3; [A(200nm) and B(400nm)]**

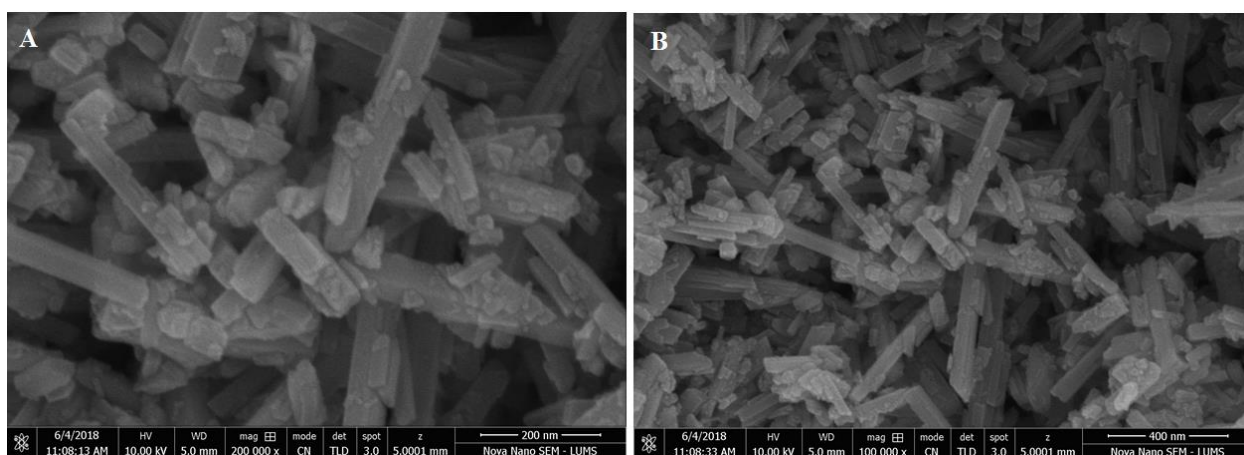

**Figure S2(d): SEM Images of MH4; [A(200nm) and B(400nm)]**

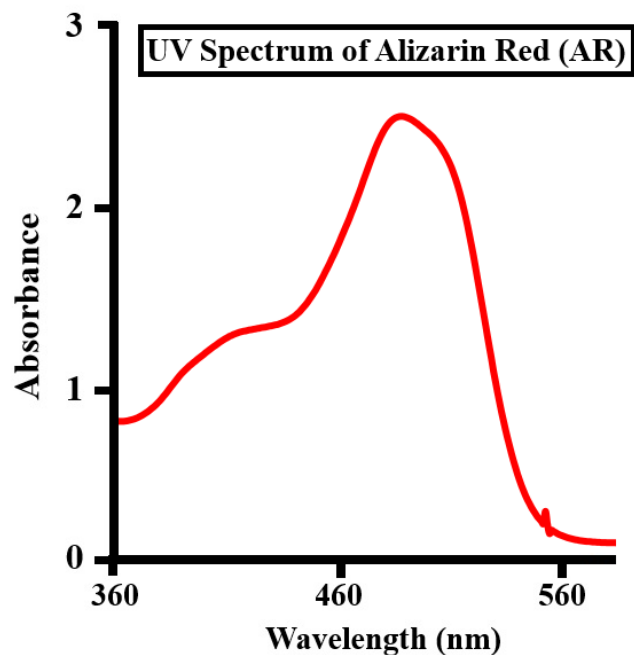

**Figure S3(a):** UV Absorption Spectrum of AR Dye; [No change was observed in UV spectrum taken before and after 180 min of AR degradation activity without UV light irradiation and catalyst]

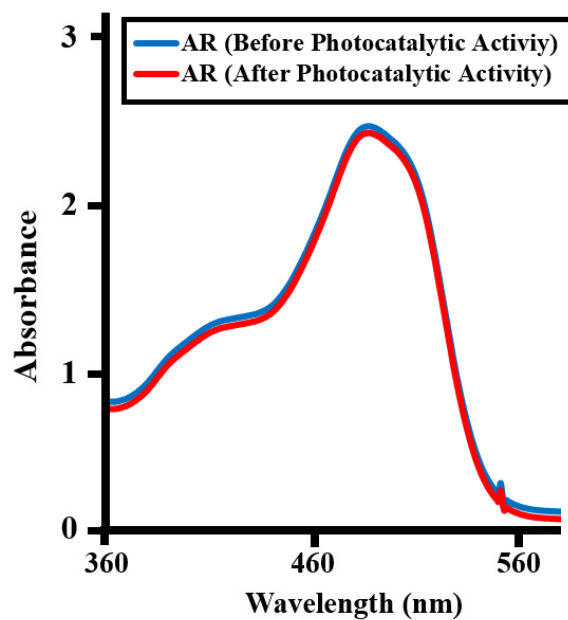

**Figure S3(b):** UV Absorption Spectra of AR Dye; [before starting Photocatalytic AR degradation and after 180 min of AR degradation activity with UV light irradiation without catalyst]

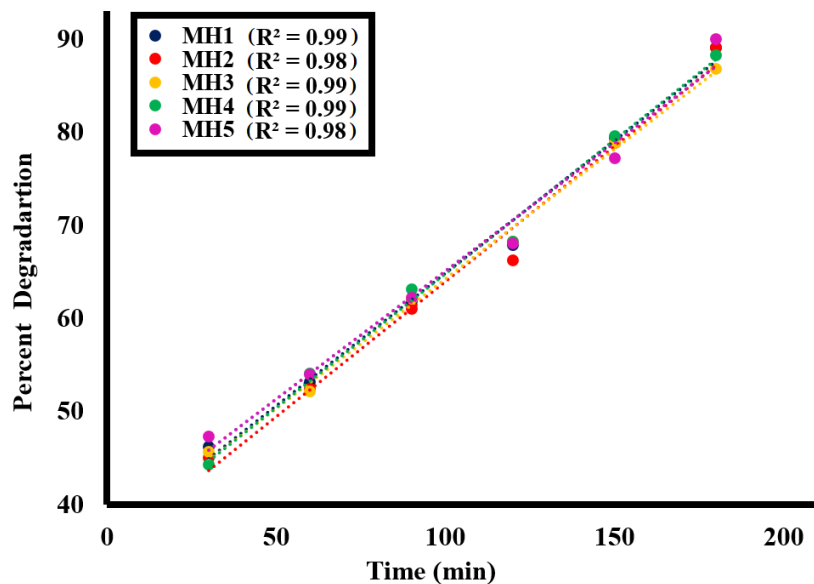

**Figure S4:** Percent AR Dye Degradation at Different Time Intervals (30, 60, 90, 120, 150 and 180 min) by Photocatalysts (MH1-MH5)

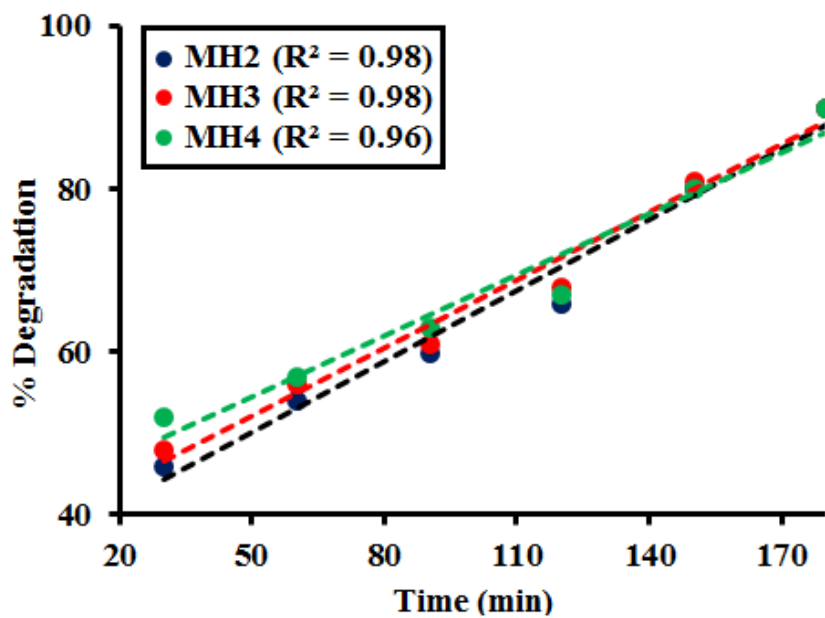

**Fig S5:** Correlation between Time and %Degradation of Alizarin Red (AR) Dye (200ppm) by 0.02g of Nanomaterials MH2-MH4

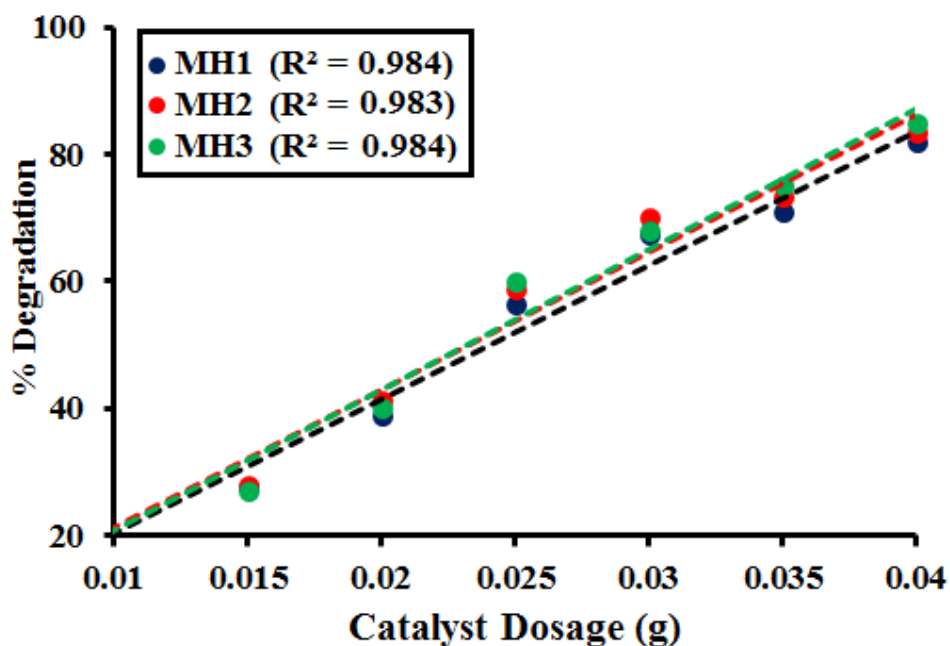

**Figure S6:** Correlation between %Degradation of Alizarin Red (AR) Dye (200 ppm) and Different Catalyst Doses of **MH1-MH3** after 60min of Photocatalytic Activity

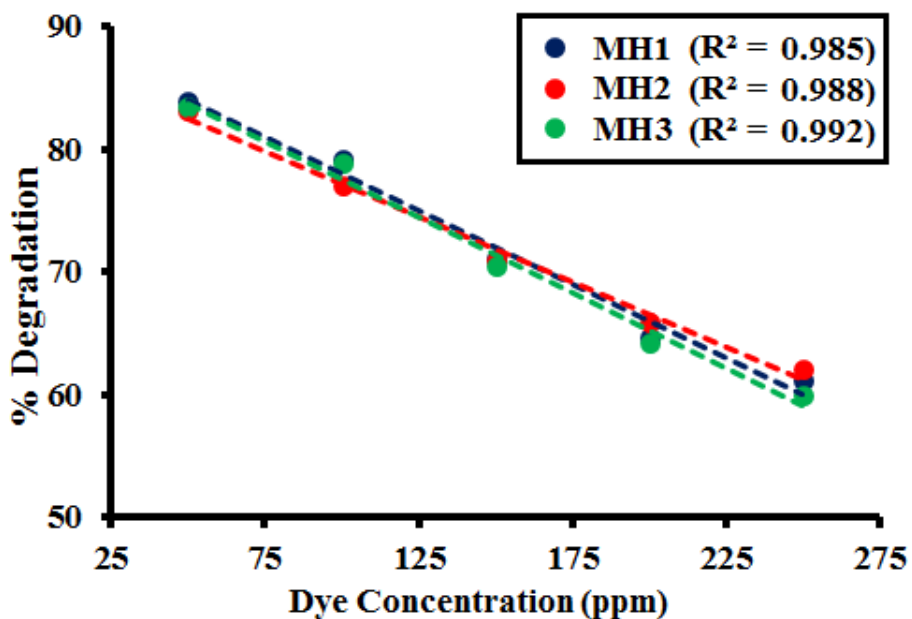

**Figure S7:** Correlation between %Degradation of Alizarin Red (AR) Dye by 0.02g of Nanomaterials **MH1-MH3** at Different Dye Concentrations (50-250ppm)

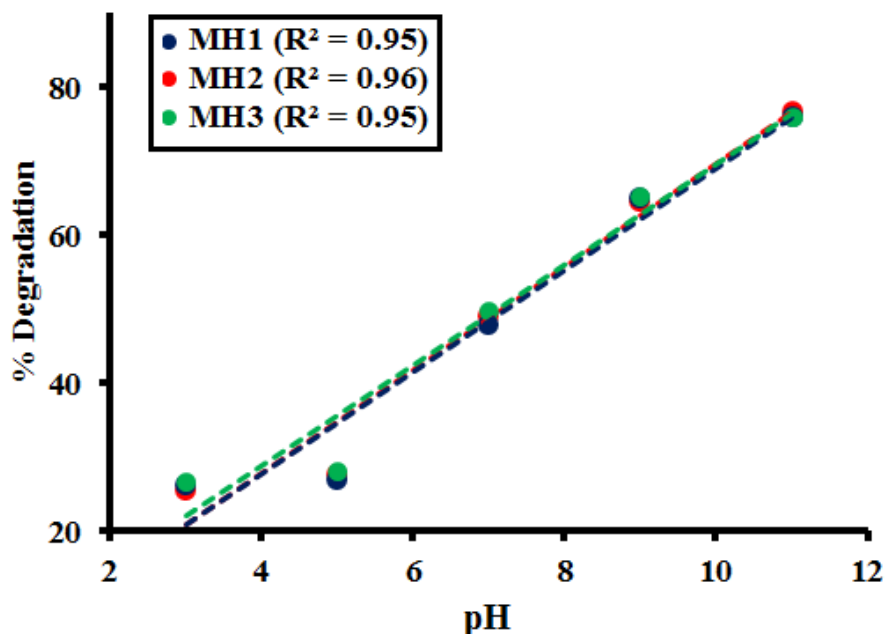

**Figure S8:** Correlation between % Degradation of Alizarin Red (AR) Dye (200ppm) by 0.02g of Nanomaterials **MH1-MH3** and Different Time Intervals

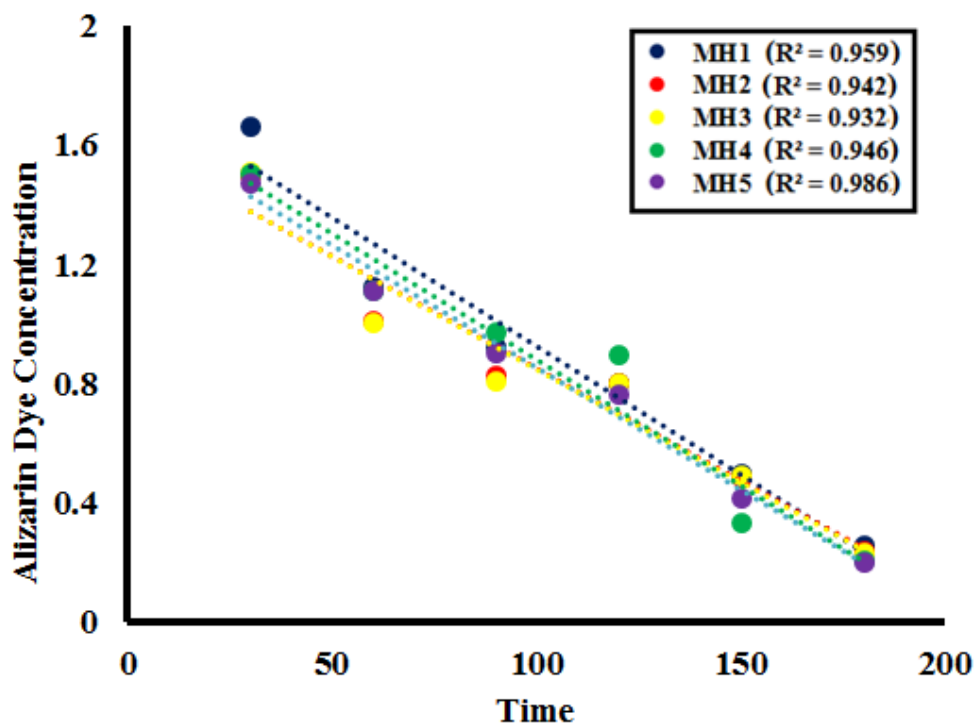

**Figure S9:** Correlation between Alizarin Red (AR) Dye Concentration of Photocatalytic Activity by 0.02g of Nanomaterials (**MH1-MH5**) at Different Time Intervals

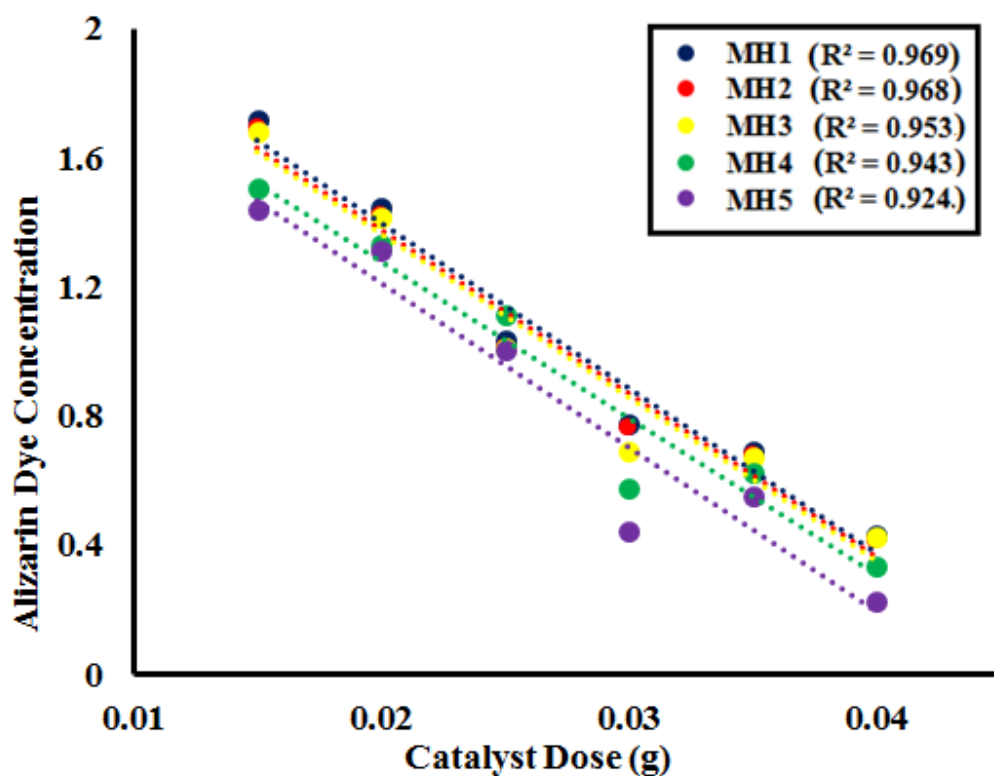

Figure S10: Correlation between Alizarin Red (AR) Dye Concentration after 60min of Photocatalytic Activity by Nanomaterials (MH1-MH5) at Different Catalyst Doses

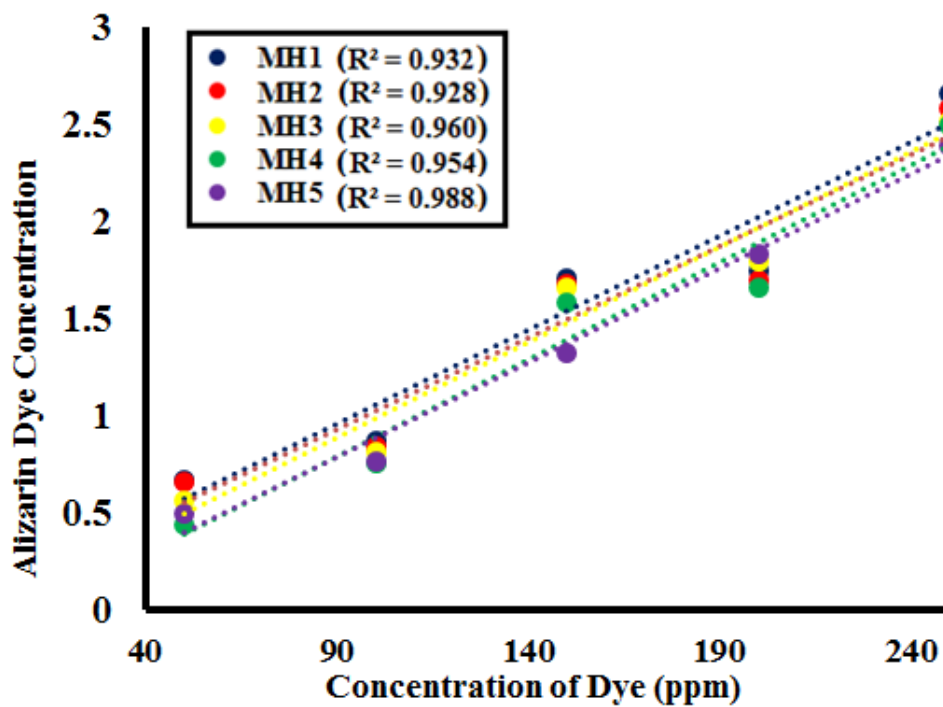



Figure S11: Correlation between Alizarin Red (AR) Dye Concentration after 60min of Photocatalytic Activity by Nanomaterials (MH1-MH5) at Different Dye Concentrations

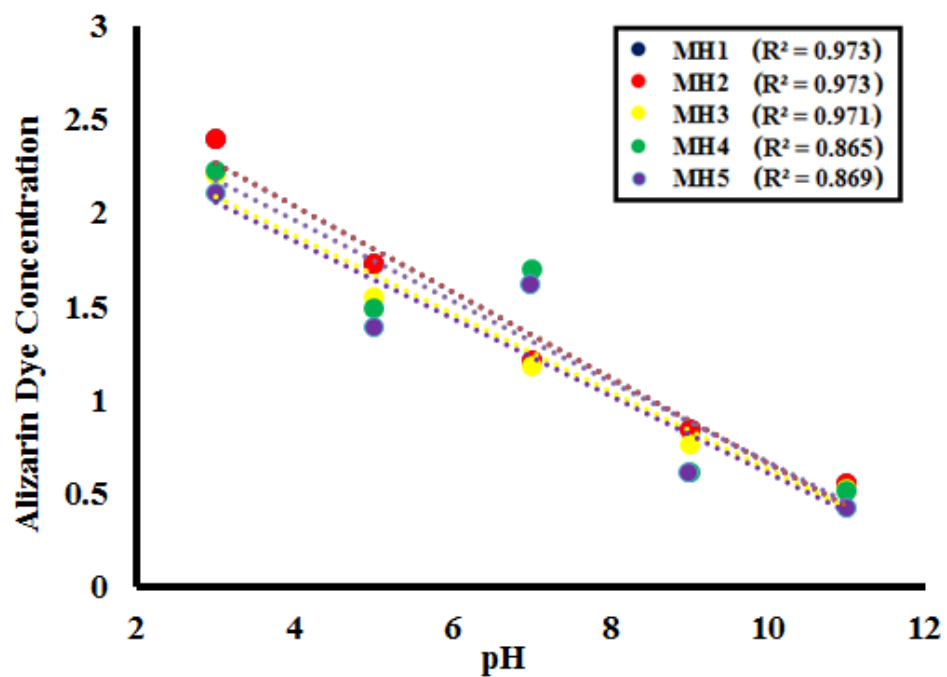

Figure S12: Correlation between Alizarin Red (AR) Dye Concentration after 60min of Photocatalytic Activity by Nanomaterials (MH1-MH5) at Different pH
